# Supplementary material for: Antibacterial Activity of Oregano (Origanum vulgare L.) Essential Oil Vapors against Microbial Contaminants of Food-Contact Surfaces
Source: MDPI journal article supplement (doi:10.3390/antibiotics13040371), 2024-04-18
Supplement: s1 [file s1]

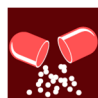

Article

# Antibacterial Activity of Oregano (*Origanum vulgare* L.) Essential Oil Vapors against Microbial Contaminants of Food-Contact Surfaces

Loris Pinto, Salvatore Cervellieri, Thomas Netti, Vincenzo Lippolis and Federico Baruzzi \*

Institute of Sciences of Food Production, National Research Council of Italy, Via G. Amendola 122/O, 70126 Bari, Italy; th.netti97@gmail.com (T.N.); salvatore.cervellieri@ispa.cnr.it (S.C.); vincenzo.lippolis@ispa.cnr.it (V.L.); federico.baruzzi@ispa.cnr.it (F.B.)

\* Correspondence: federico.baruzzi@ispa.cnr.it (F.B.); Tel.: +39-080-5929319

## Supplementary Materials

---

**Table S1.** Mean concentration (ng mL<sup>-1</sup>) of volatile compounds in boxes with 377 µg cm<sup>-3</sup> air or 754 µg cm<sup>-3</sup> air of OVO, during 24 h at 25 °C.

| Concentration of OVO        | Time | Concentration (ng mL <sup>-1</sup> ) |          |           |        |          |          |          |           |             |          |          |         |                     |              |
|-----------------------------|------|--------------------------------------|----------|-----------|--------|----------|----------|----------|-----------|-------------|----------|----------|---------|---------------------|--------------|
|                             |      | γ-Terpinene                          | p-Cymene | Carvacrol | Thymol | α-Pinene | Camphene | β-Pinene | β-Myrcene | α-Terpinene | Limonene | o-Cymene | Linalol | Thymol methyl ether | 1-octen-3-ol |
| 377 µg cm <sup>-3</sup> air | 0 h  | 29,22a                               | 379,22a  | 15,85a    | 1,26a  | 1564,98a | 93,64a   | 43,69a   | 84,25a    | 5,53a       | 13,28a   | 2,65a    | 5,37a   | 0,23a               | 0,11a        |
|                             |      | ± 1,48                               | ± 40,57  | ± 2,28    | ± 0,09 | ± 467,40 | ± 30,57  | ± 15,20  | ± 16,10   | ± 0,44      | ± 0,99   | ± 0,06   | ± 1,71  | ± 0,09              | ± 0,07       |
|                             | 8 h  | 46,44b                               | 506,98a  | 34,58b    | 2,31b  | 1401,91a | 88,53a   | 45,34a   | 106,16a   | 6,37a       | 16,56a   | 2,92b    | 12,53b  | 0,52a               | 0,31a        |
|                             |      | ± 5,64                               | ± 56,59  | ± 1,31    | ± 0,18 | ± 31,86  | ± 2,25   | ± 1,61   | ± 14,44   | ± 0,54      | ± 1,49   | ± 0,08   | ± 1,80  | ± 0,12              | ± 0,06       |
|                             | 24 h | 29,01a                               | 343,23a  | 46,17c    | 2,80b  | 1008,92a | 62,06a   | 28,61a   | 63,45a    | 4,72a       | 11,59a   | 2,67a    | 14,30b  | 0,65a               | 0,34a        |
|                             |      | ± 1,99                               | ± 16,72  | ± 1,23    | ± 0,12 | ± 95,81  | ± 8,27   | ± 5,32   | ± 4,28    | ± 0,14      | ± 0,65   | ± 0,02   | ± 0,96  | ± 0,09              | ± 0,04       |
| 754 µg cm <sup>-3</sup> air | 0 h  | 52,55a                               | 555,84a  | 18,91a    | 1,43a  | 2234,92a | 121,75a  | 67,86a   | 138,57a   | 7,64a       | 19,71a   | 2,92a    | 4,49a   | 0,16a               | 0,06a        |
|                             |      | ± 23,15                              | ± 198,02 | ± 7,99    | ± 0,51 | ± 381,50 | ± 33,23  | ± 22,63  | ± 56,79   | ± 2,15      | ± 6,87   | ± 0,31   | ± 0,32  | ± 0,03              | ± 0,01       |
|                             | 8 h  | 71,98a                               | 700,68a  | 34,98a    | 2,29a  | 2295,94a | 137,72a  | 78,35a   | 172,65a   | 9,03a       | 24,10a   | 3,27a    | 14,33b  | 0,51b               | 0,36b        |
|                             |      | ± 14,38                              | ± 113,21 | ± 8,24    | ± 0,42 | ± 351,81 | ± 24,35  | ± 15,35  | ± 35,65   | ± 1,31      | ± 4,19   | ± 0,19   | ± 0,10  | ± 0,02              | ± 0,01       |
|                             | 24 h | 55,85a                               | 582,12a  | 48,34a    | 2,91a  | 1763,33a | 112,77a  | 61,50a   | 132,33a   | 7,46a       | 19,32a   | 3,07a    | 15,63b  | 0,48b               | 0,38b        |
|                             |      | ± 8,33                               | ± 59,36  | ± 6,18    | ± 0,39 | ± 69,18  | ± 6,53   | ± 4,92   | ± 17,51   | ± 0,72      | ± 2,24   | ± 0,11   | ± 1,63  | ± 0,06              | ± 0,05       |

One-way ANOVA analysis ( $P \leq 0.05$ ) was applied to differentiate mean values. The least significant difference (LSD) values were calculated to separate mean values for each compound, at each concentration of OVO: 377 µg cm<sup>-3</sup> air of OVO, γ-Terpinene 13,97 ng mL<sup>-1</sup>; p-Cymene 164,95 ng mL<sup>-1</sup>; carvacrol 6,39 ng mL<sup>-1</sup>; thymol 0,59 ng mL<sup>-1</sup>; α-Pinene 1102,93 ng mL<sup>-1</sup>; camphene 73,31 ng mL<sup>-1</sup>; β-Pinene 36,59 ng mL<sup>-1</sup>; β-Myrcene 51,03 ng mL<sup>-1</sup>; α-Terpinene 1,62 ng mL<sup>-1</sup>; limonene 3,76 ng mL<sup>-1</sup>; o-Cymene 0,23 ng mL<sup>-1</sup>; linalol 6,13 ng mL<sup>-1</sup>; thymol methyl ether 0,44 ng mL<sup>-1</sup>; 1-octen-3-ol 0,29 ng mL<sup>-1</sup>; 754 µg cm<sup>-3</sup> air of OVO, γ-Terpinene 66,25 ng mL<sup>-1</sup>; p-Cymene 543,28 ng mL<sup>-1</sup>; carvacrol 31,07 ng mL<sup>-1</sup>; thymol 1,68 ng mL<sup>-1</sup>; α-Pinene 1206,82 ng mL<sup>-1</sup>; camphene 95,95 ng mL<sup>-1</sup>; β-Pinene 63,16 ng mL<sup>-1</sup>; β-Myrcene 160,41 ng mL<sup>-1</sup>; α-Terpinene 6,08 ng mL<sup>-1</sup>; limonene 18,88 ng mL<sup>-1</sup>; o-Cymene 0,85 ng mL<sup>-1</sup>; linalol 3,78 ng mL<sup>-1</sup>; thymol methyl ether 0,19 ng mL<sup>-1</sup>; 1-octen-3-ol 0,13 ng mL<sup>-1</sup>. Different lowercase letters indicate significant differences within columns at each concentration of OVO.

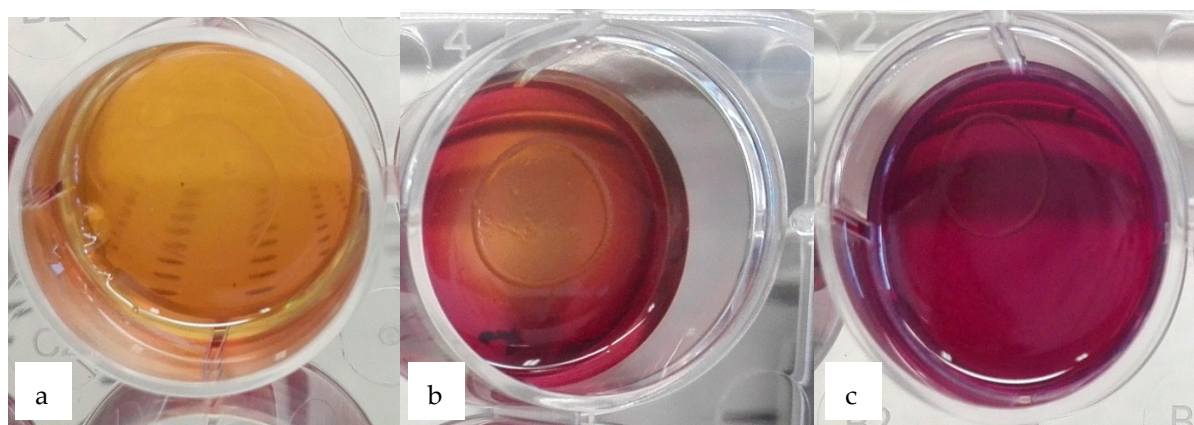

**Figure S1.** Colour of NGBA medium inoculated with bacterial strains and exposed to essential oil vapours for 24 h at 30°C or 37 °C: (a) bacterial growth, complete acidification; (b) partial bacterial growth, partial acidification; (c) no bacterial growth, no acidification that were scored 5, 3 and 0, respectively.
